# Supplementary material
Source: PubMed Central journal article supplement (PMC5916037)
Supplement: NIHMS953327-supplement-Online_Supplemental_Material.pdf [file NIHMS953327-supplement-Online_Supplemental_Material.pdf]

**ONLINE SUPPLEMENTAL MATERIAL**

**Infections and Risk of Peripartum Stroke during Delivery Admissions**

Eliza C. Miller MD<sup>1</sup>, Marisa Gallo MPH<sup>1,2</sup>, Erin R. Kulick MPH<sup>1,2</sup>, Alexander M. Friedman MD<sup>3</sup>, Mitchell S.V. Elkind MD MS<sup>1,2</sup>, Amelia K. Boehme PhD MSPH<sup>1,2</sup>

<sup>1</sup> *Department of Neurology, Vagelos College of Physicians and Surgeons, Columbia University, New York, NY*

<sup>2</sup> *Department of Epidemiology, Mailman School of Public Health, Columbia University, New York, NY*

<sup>3</sup> *Department of Obstetrics and Gynecology, Vagelos College of Physicians and Surgeons, Columbia University, New York, NY*

***Table of Contents***

Supplemental Table I. International Classification of Diseases, 9th Revision, Clinical Modification Codes Used to Identify Deliveries and Pregnancy Characteristics.....Supplement Page 2

Supplemental Table II. International Classification of Diseases, 9th Revision, Clinical Modification Codes Used to Identify Exposures of Interest.....Supplement Page 3

Supplemental Table III. International Classification of Diseases, 9th Revision, Clinical Modification Codes Used to Identify Primary Outcome.....Supplement Page 4

**Supplemental Table I. International Classification of Diseases, 9th Revision, Clinical Modification Codes Used to Identify Deliveries and Pregnancy Characteristics**

| <b>IDENTIFICATION OF DELIVERIES AND PREGNANCY CHARACTERISTICS</b> | <b>Diagnostic Codes</b>                                                                                                                                        |
|-------------------------------------------------------------------|----------------------------------------------------------------------------------------------------------------------------------------------------------------|
| Delivery admission (1/1/2007 – 9/30/2007)                         | MDC 14 (pregnancy, childbirth and puerperium) <i>and</i> DRG 370, 371, 372, 373, 374, or 375                                                                   |
| Delivery admission (10/1/2007-12/31/2011)                         | MDC 14 (pregnancy, childbirth and puerperium) <i>and</i> DRG 765, 766, 767, 768, 774, or 775                                                                   |
| Vaginal delivery                                                  | DRG 372-375 (1/1/2007-9/30/2007), DRG 767, 768, 774, 775 (10/1/2007-12/31/2011)                                                                                |
| Cesarean delivery                                                 | DRG 370-371 (1/1/2007-9/30/2007), DRG 765-766 (10/1/2007-12/31/2011), ICD-9 649.8, 652.21, 653.4, 653.41, 654.2x, 654.21, 656.31, 669.7, 669.71, 660.11, 763.4 |
| Gestational hypertension                                          | 642.3x, 642.9x                                                                                                                                                 |
| Mild or unspecified preeclampsia                                  | 642.4x, 642.7x                                                                                                                                                 |
| Severe preeclampsia                                               | 642.5x                                                                                                                                                         |
| Eclampsia                                                         | 642.6x                                                                                                                                                         |

**Supplemental Table II. International Classification of Diseases, 9th Revision, Clinical Modification Codes Used to Identify Exposures of Interest**

| <b>Primary exposure “infection” included infection of any type present on admission, including any of the following</b> | <b>Diagnostic Codes</b>                                                                                                                                                                                       |
|-------------------------------------------------------------------------------------------------------------------------|---------------------------------------------------------------------------------------------------------------------------------------------------------------------------------------------------------------|
| <i>Sepsis</i>                                                                                                           | 022.3, 036.2, 038.x, 054.5, 449, 670.0x, 790.7, 995.91, 785.52                                                                                                                                                |
| <i>Genitourinary</i>                                                                                                    | 590.x, 595.x, 597.x, 598.x, 599.0, 658.4x, 670.x                                                                                                                                                              |
| <i>Sexually transmitted</i>                                                                                             | 054.x, 091.x, 092.x, 093.x, 094.x, 095.x, 096.x, 097.x, 098.x, 099.x, 131.x, 647.x, 042.x, V08.x                                                                                                              |
| <i>Respiratory</i>                                                                                                      | 011, 012, 021.x, 032.x, 033.x, 034.0, 039.1, 052.1, 055.1, 073.0, 112.4, 114.x, 115.x, 130.4, 136.3, 480.x, 460, 461.x, 462, 464.x, 465.x, 473.x, 480.x, 481, 482.x, 483.x, 484.x, 485, 513.0, 517.1, 784.91, |
| <i>Other infections</i>                                                                                                 | 001.x, 002.x, 003.x, 004.x, 005.x, 006.x, 007.x, 008.x, 009.x, 020.x, 031.x, 088.81, 083.0, 114.1, 681.x, 682.x, 686.x, , 686.x, 647.x, 675.x, 672.x, 646.6                                                   |
|                                                                                                                         |                                                                                                                                                                                                               |
| <b>Secondary exposures of interest</b>                                                                                  | <b>Diagnostic codes</b>                                                                                                                                                                                       |
| Sickle cell disease                                                                                                     | 282.4x, 282.6x                                                                                                                                                                                                |
| Systemic lupus erythematosus                                                                                            | 710.0x                                                                                                                                                                                                        |
| Coagulopathy                                                                                                            | 286.0-286.9, 287.1, 287.3-287.5, 289.81-289.82                                                                                                                                                                |
| Hypercoagulable state                                                                                                   | 289.81, 289.82, 649.3x                                                                                                                                                                                        |
| DVT/PE (acute, chronic, or history of prior)                                                                            | 415.1x, 453.4x, 453.5x, 453.7x, 453.8x, 671.3x, 671.4x, 673.x, V125.1, V125.5                                                                                                                                 |
| Chronic renal disease                                                                                                   | 581.x-583.x, 585.x, 587.x, 588.x, 646.2x                                                                                                                                                                      |
| Active smoking                                                                                                          | 305.1.x, 649.0x                                                                                                                                                                                               |
| Preexisting hypertension                                                                                                | 401.x-405.x, 642.0x-642.2x, 642.7x                                                                                                                                                                            |
| Diabetes mellitus (excluding gestational diabetes)                                                                      | 250.x, 648.0x                                                                                                                                                                                                 |
| Alcohol abuse                                                                                                           | 291.xx, 303.xx, 305.0x                                                                                                                                                                                        |
| Gestational diabetes                                                                                                    | 648.8x                                                                                                                                                                                                        |

**Supplemental Table III. International Classification of Diseases, 9th Revision, Clinical Modification Codes Used to Identify Primary Outcome**

| <b>Primary outcome “stroke diagnosis” included any of the following diagnosis codes:</b>                                  | <b>Diagnostic code</b>                                                                          | <b>Sensitivity%/specificity%/PPV%(95%CI)*</b>                                                                                                 |
|---------------------------------------------------------------------------------------------------------------------------|-------------------------------------------------------------------------------------------------|-----------------------------------------------------------------------------------------------------------------------------------------------|
| Ischemic stroke <sup>1</sup>                                                                                              | 433.01, 433.10, 433.11, 433.21, 433.31, 433.81, 433.91, 434.00, 434.01, 434.11, 434.91, and 436 | Sensitivity 86 (73-94)<br>Specificity 95 (88-98)<br>PPV 90 (77-97)                                                                            |
| Intracerebral hemorrhage <sup>1</sup>                                                                                     | 431                                                                                             | Sensitivity 82 (66-92)<br>Specificity 93 (86-97)<br>PPV 80 (64-91)                                                                            |
| Subarachnoid hemorrhage <sup>1</sup>                                                                                      | 430                                                                                             | Sensitivity 98 (90-100)<br>Specificity 92 (84-96)<br>PPV 86 (75-94)                                                                           |
| Cerebral venous thrombosis <sup>2</sup>                                                                                   | 325                                                                                             | Sensitivity 70.4 (66.7-83.4)<br>Specificity 96.9 (94.4-98.3)<br>PPV 87.4 (78.6-93.0)                                                          |
| Peripartum phlebitis and thrombosis, cerebral venous thrombosis, and thrombosis of intracranial venous sinus <sup>2</sup> | 671.5                                                                                           | Sensitivity 77.8 (69.0-84.6)<br>Specificity 92.7 (89.5-94.9)<br>PPV 75.7 (66.9-82.8)                                                          |
| Cerebrovascular disorders in the puerperium <sup>3</sup>                                                                  | 674.00, 674.01, 674.02, 674.03, 674.04                                                          | Sensitivity: 92 internally validated <sup>4</sup><br>Specificity: not available<br>PPV: 68 (48-84); internally validated at 80.4 <sup>5</sup> |

*PPV: positive predictive value. CI: confidence interval.*

*\*Sensitivity and specificity based on studies referenced.*

## REFERENCES

1. Tirschwell DL, Longstreth WT. Validating administrative data in stroke research. *Stroke*. 2002;33:2465–2470.
2. Liberman AL, Kamel H, Mullen MT, Messé SR. International Classification of Diseases, Ninth Revision (ICD-9)Diagnosis Codes Can Identify Cerebral Venous Thrombosis in Hospitalized Adults. *Neurohospitalist*. 2016;6:147–150.
3. Sigakis MJG, Leffert LR, Mirzakhani H, Sharawi N, Rajala B, Callaghan WM, et al. The Validity of Discharge Billing Codes Reflecting Severe Maternal Morbidity. *Anesthesia & Analgesia*. 2016;123:731–738.
4. Miller EC, Gatollari HJ, Too G, Boehme AK, Leffert LR, Elkind MSV, et al. Risk of Pregnancy-Associated Stroke Across Age Groups in New York State. *JAMA Neurol*. 2016;73:1461–1467.
5. Miller EC, Gatollari HJ, Too G, Boehme AK, Leffert LR, Marshall RS, et al. Risk Factors for Pregnancy-Associated Stroke in Women With Preeclampsia. *Stroke*. 2017;48:1752–1759.
